# Supplementary material for: Application of portable FTIR spectrometers for detecting greenhouse gas emissions of the major city Berlin
Source: Copernicus journal article supplement (doi:10.5194/amt-8-3059-2015), 2015-07-31
Supplement: Supplementary file 1 [file amt-8-3059-2015-supplement.zip]

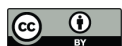

## *Supplement of*

# **Application of portable FTIR spectrometers for detecting greenhouse gas emissions of the major city Berlin**

**F. Hase et al.**

*Correspondence to:* F. Hase (frank.hase@kit.edu)

- amt-8-3059-2015-supplement-title-page.pdf
- electronic-supplement

### – FTIR

- \* AK-ch4-16degSEA.dat
- \* AK-ch4-25degSEA.dat
- \* AK-ch4-38degSEA.dat
- \* AK-ch4-60degSEA.dat
- \* AK-co2-16degSEA.dat
- \* AK-co2-25degSEA.dat
- \* AK-co2-38degSEA.dat
- \* AK-co2-60degSEA.dat
- \* Charlottenburg.dat
- \* Heiligensee.dat
- \* Lichtenrade.dat
- \* Lindenberg.dat
- \* Mahlsdorf.dat
- \* apriori-ch4.dat
- \* apriori-co2.dat

### – ceilometer

- \* 201406260000.txt
- \* 201406270000.txt
- \* 201406280000.txt
- \* 201406290000.txt
- \* 201406300000.txt
- \* 201407010000.txt
- \* 201407020000.txt
- \* 201407030000.txt

- \* 201407040000.txt
- \* 201407050000.txt
- \* 201407060000.txt
- \* 201407070000.txt
- \* 201407080000.txt
- \* 201407090000.txt
- \* 201407100000.txt
- \* 201407110000.txt
- \* d2014062600.png
- \* d2014062700.png
- \* d2014062800.png
- \* d2014062900.png
- \* d2014063000.png
- \* d2014070100.png
- \* d2014070200.png
- \* d2014070300.png
- \* d2014070400.png
- \* d2014070500.png
- \* d2014070600.png
- \* d2014070700.png
- \* d2014070800.png
- \* d2014070900.png
- \* d2014071000.png
- \* d2014071100.png

The copyright of individual parts of the supplement might differ from the CC-BY 3.0 licence.
